# Supplementary material for: The Mitochondrial Genome of the Entomoparasitic Green Alga Helicosporidium
Source: PubMed Central journal article supplement (PMC2813288; doi:10.1371/journal.pone.0008954), 2010-01-29

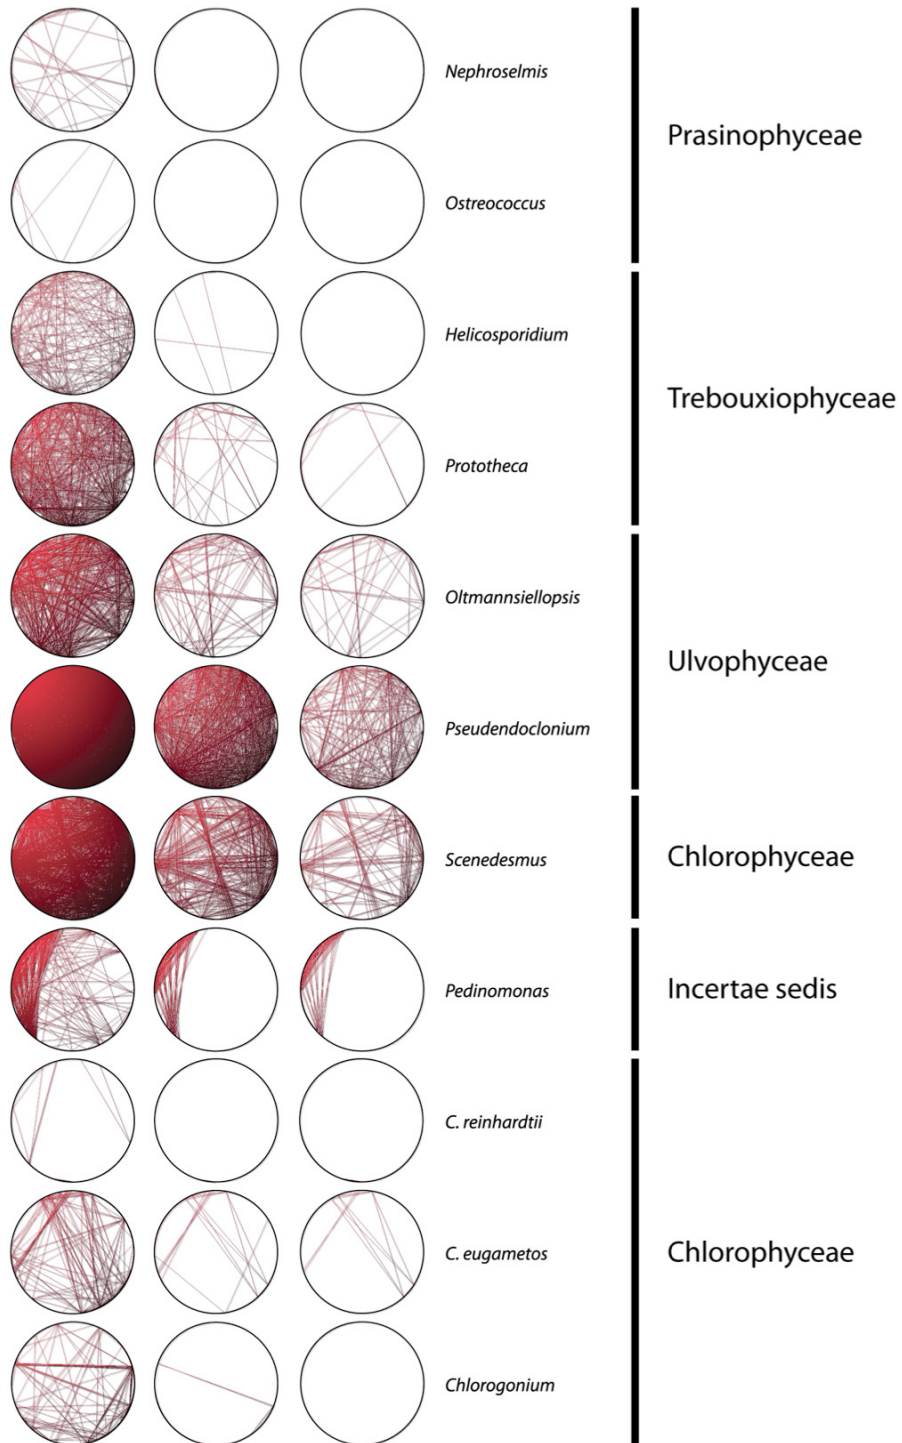

Supplement: pone.0008954.s003.pdf [file pone.0008954.s003.pdf]
